# Supplementary material for: Superb energy density of PbHfO3-based antiferroelectric ceramics via regulating the antiferroelectric–ferroelectric transition energy barrier
Source: Royal Society of Chemistry journal article supplement (doi:10.1039/d4ta04971c), 2024-01-01
Supplement: d4ta04971c1.pdf [file d4ta04971c1.pdf]

**Superb Energy Density of PbHfO<sub>3</sub>-Based Antiferroelectric Ceramics via Regulating the Antiferroelectric-Ferroelectric Transition Energy Barrier**

Jiawen Hu<sup>1#</sup>, Zihao Zheng<sup>3#</sup>, Tao Zhang<sup>3</sup>, Ling Lv<sup>1</sup>, Zhixin Zhou<sup>1</sup>, Jinjun Liu<sup>1</sup>, Peng Li<sup>2</sup>, Yunye Cao<sup>1\*</sup>,  
Jinming Guo<sup>3\*</sup> and Zhongbin Pan<sup>1\*</sup>

<sup>1</sup>School of Materials Science and Chemical Engineering, Ningbo University, Ningbo, Zhejiang, 315211, China. E-mail: panzhongbin@163.com, caoyunye@nbu.edu.cn

<sup>2</sup>School of Materials Science and Engineering, Liaocheng University, Liaocheng, Shandong, 252059, China.

<sup>3</sup>Electron Microscopy Center, Ministry-of-Education Key Laboratory of Green Preparation and Application for Functional Materials, School of Materials Science and Engineering, Hubei University, 430062 Wuhan, China. E-mail: guojinming@hubu.edu.cn

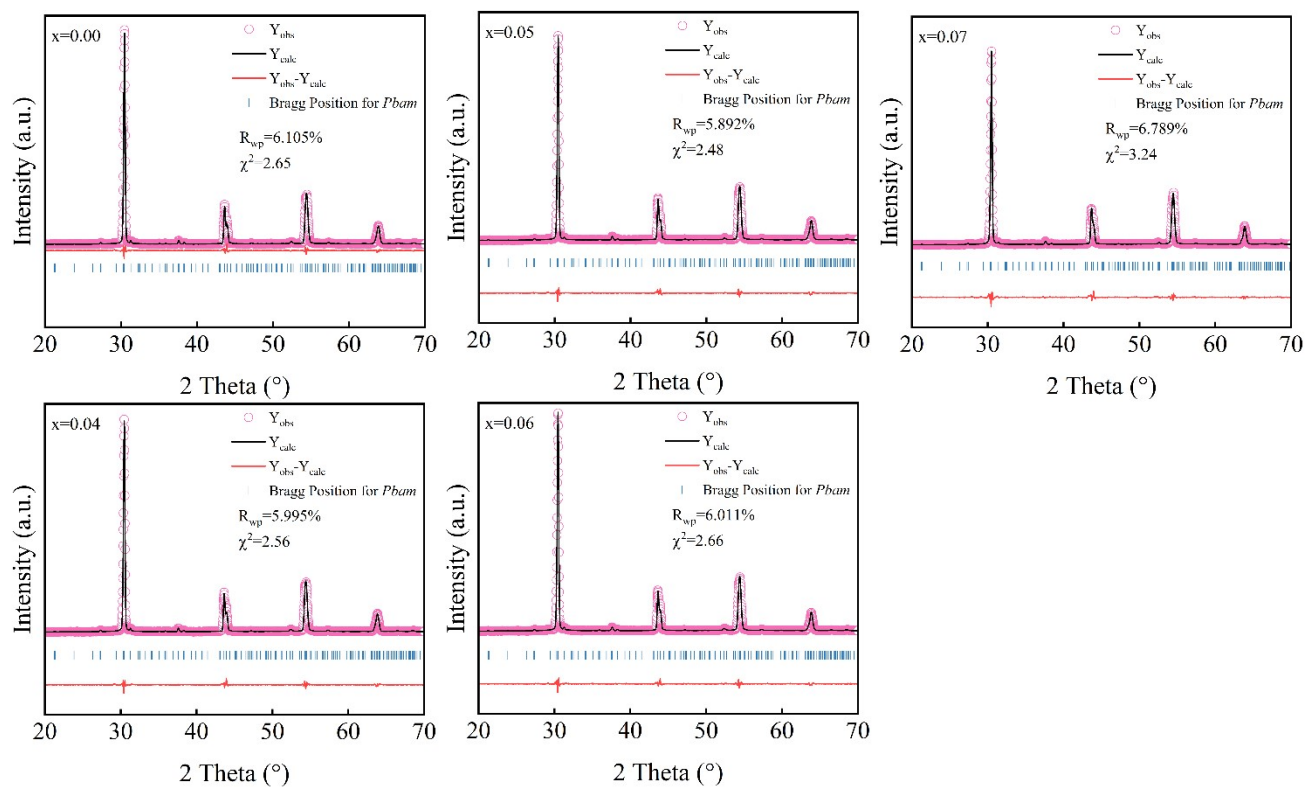

**Figure S1.** XRD refinement results of PSLHST ceramics.

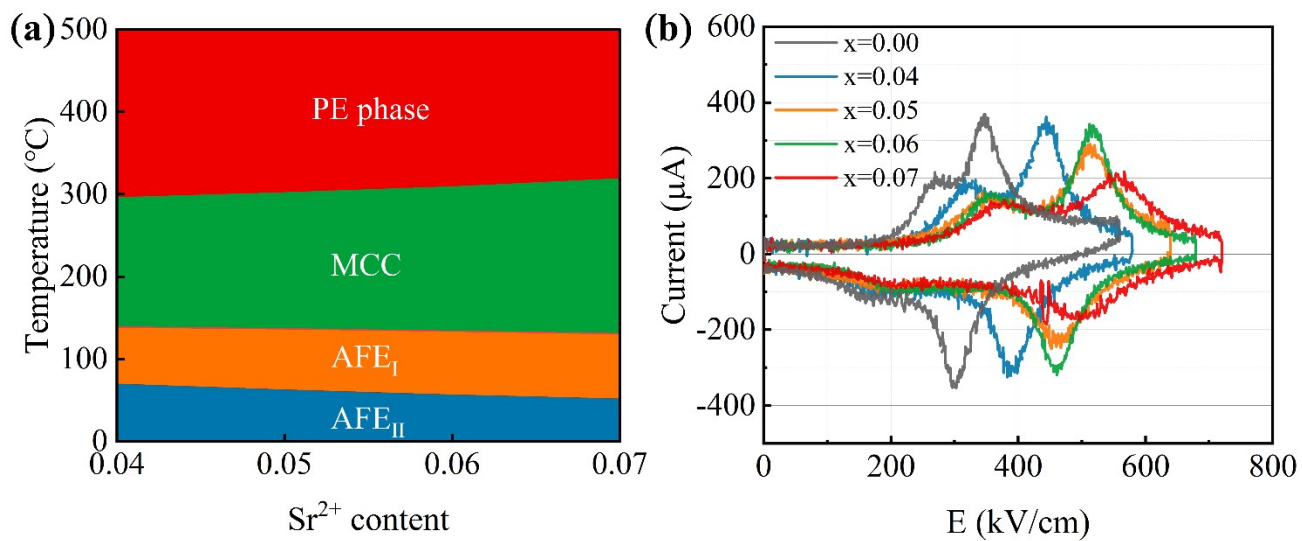

**Figure S2.** (a) PSLHST ceramics temperature-composition phase diagram. (b)  $I$ - $E$  loops of PSLHST ceramics at room temperature.

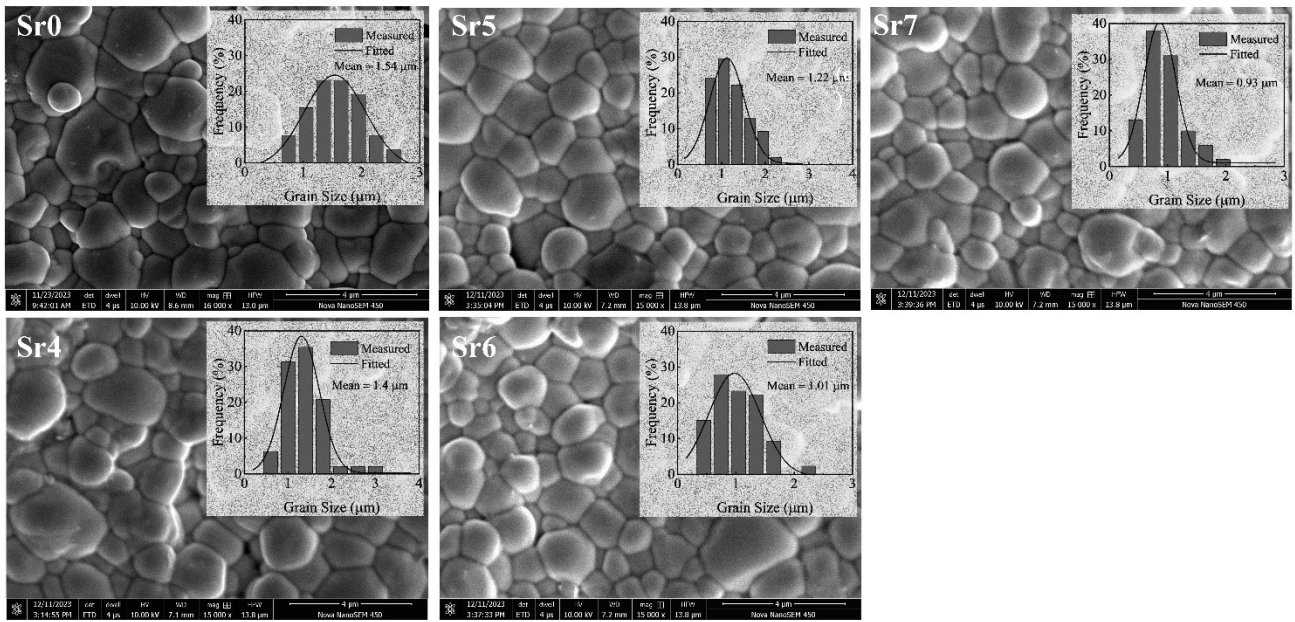

**Figure S3.** The SEM morphologies of PSLHST ceramics.

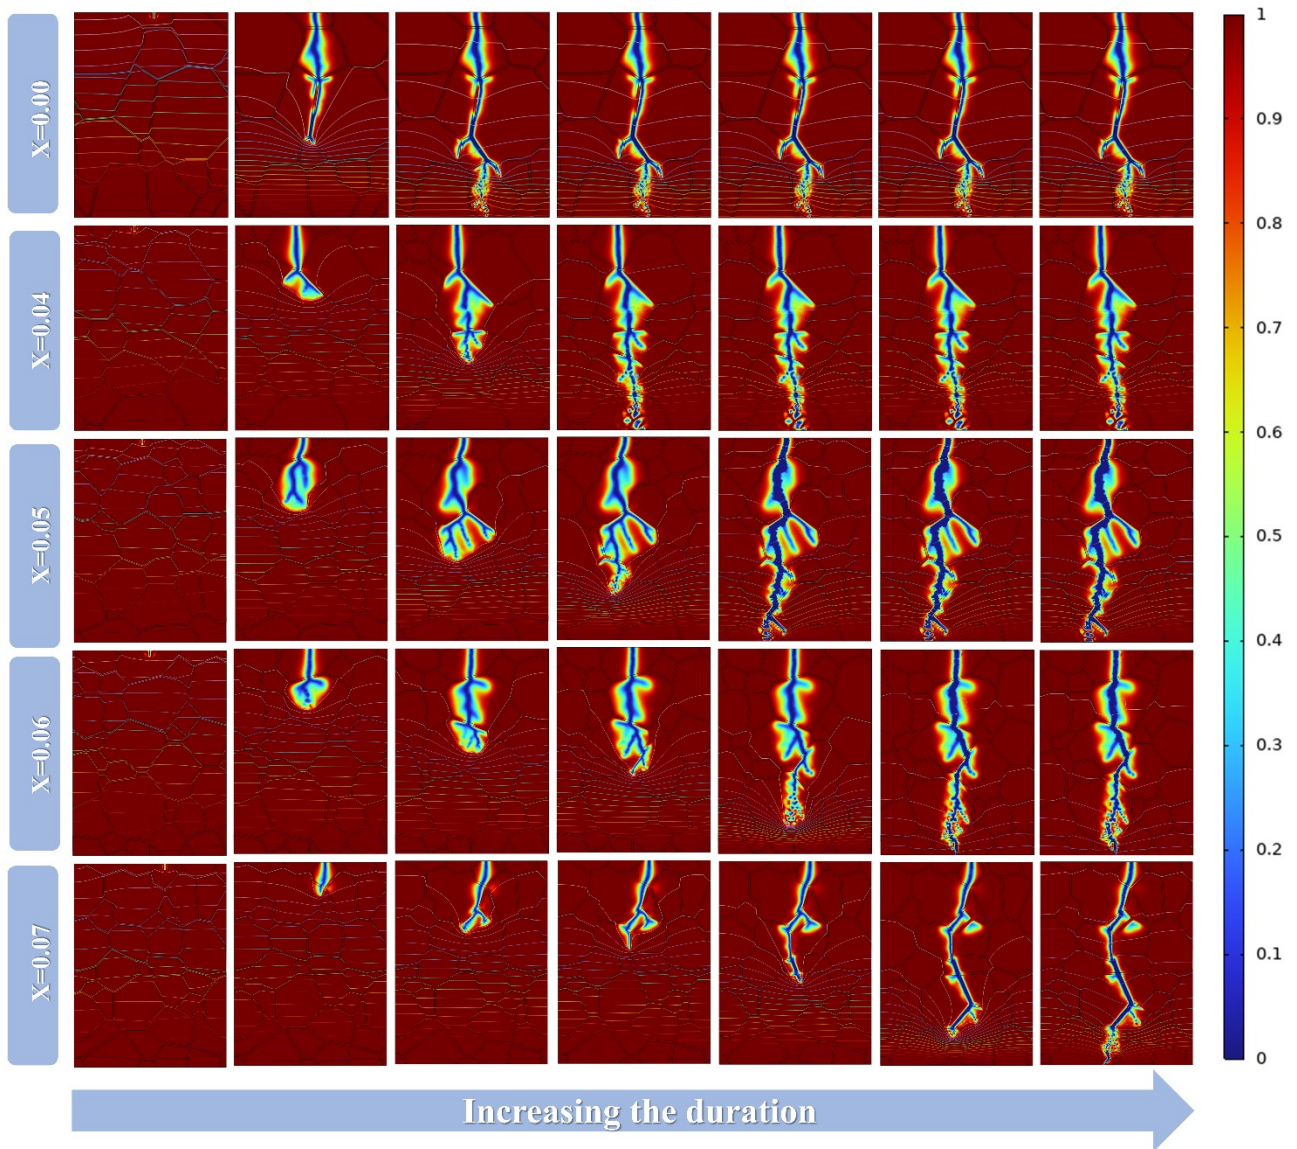

**Figure S4.** Breakdown path evolution with time in PSLHST ceramics.
